# Supplementary material for: A transcriptome atlas of the mouse iris at single-cell resolution defines cell types and the genomic response to pupil dilation
Source: eLife. 2021 Nov 16;10:e73477. doi: 10.7554/eLife.73477 (PMC8594943; doi:10.7554/eLife.73477)
Supplement: Supplementary file 2. — FC, fold change (Excel File). [file elife-73477-supp2.xlsx]

## Sheet: dilator_muscle
p_val	avg_log2FC	pct.1	pct.2	p_val_adj	cluster	gene
0	2.37153	0.727	0.063	0	dilator_muscle	AC129186.1
0	2.27778	0.796	0.109	0	dilator_muscle	Cit
0	2.21496	0.874	0.321	0	dilator_muscle	Unc13c
0	2.16066	0.93	0.38	0	dilator_muscle	Gsdme
0	2.16006	0.906	0.193	0	dilator_muscle	Myh11
0	2.15755	0.743	0.092	0	dilator_muscle	Sv2b
0	2.13454	0.996	0.793	0	dilator_muscle	Mylk
0	2.09343	0.532	0.054	0	dilator_muscle	Chrm2
0	2.06748	0.329	0.046	0	dilator_muscle	9630028H03Rik
0	2.01972	0.9	0.362	0	dilator_muscle	Dlg2
0	2.00214	0.615	0.051	0	dilator_muscle	Adra1a
0	1.96374	0.973	0.484	0	dilator_muscle	Kcnip4
0	1.93307	0.965	0.642	0	dilator_muscle	Plcb4
0	1.8811	0.973	0.643	0	dilator_muscle	Gpnmb
0	1.84156	0.801	0.137	0	dilator_muscle	Reln
0	1.83772	0.526	0.055	0	dilator_muscle	Sphkap
0	1.8359	0.764	0.168	0	dilator_muscle	Smtn
0	1.81178	0.642	0.079	0	dilator_muscle	Mapk4
0	1.79492	0.758	0.128	0	dilator_muscle	Otx2os1
0	1.78523	0.744	0.183	0	dilator_muscle	Pdgfa

## Sheet: sphincter_muscle_1
p_val	avg_log2FC	pct.1	pct.2	p_val_adj	cluster	gene
0	4.85674	0.988	0.077	0	sphincter_muscle_1	Chrm3
0	4.75599	0.972	0.084	0	sphincter_muscle_1	Syt1
0	4.1608	0.945	0.046	0	sphincter_muscle_1	Mybpc1
0	3.20513	0.893	0.294	0	sphincter_muscle_1	Dmd
0	3.07802	0.903	0.131	0	sphincter_muscle_1	Csrp2
0	2.74971	0.971	0.286	0	sphincter_muscle_1	Synpo2
0	2.55882	0.982	0.409	0	sphincter_muscle_1	Carmn
0	2.41615	0.927	0.277	0	sphincter_muscle_1	Ryr3
1.2e-322	2.98842	0.84	0.044	2.79317e-318	sphincter_muscle_1	Myocd
2.555e-319	2.95086	0.839	0.049	6.0185841e-315	sphincter_muscle_1	Kcnma1
1.50737e-303	2.50702	0.833	0.103	3.55075e-299	sphincter_muscle_1	Rbfox3
3.65915e-288	2.75711	0.814	0.081	8.61948e-284	sphincter_muscle_1	Hdac9
8.67508e-283	2.37094	0.838	0.177	2.0435e-278	sphincter_muscle_1	Ppm1l
1.10616e-276	2.44268	0.846	0.2	2.60568e-272	sphincter_muscle_1	Sh3gl2
2.37505e-260	3.27962	0.783	0.109	5.59466e-256	sphincter_muscle_1	Ctnna3
1.72895e-237	2.45631	0.72	0.023	4.07272e-233	sphincter_muscle_1	Entpd1
1.33942e-224	3.88716	0.7	0.018	3.15513e-220	sphincter_muscle_1	Ttn
7.20993e-193	2.28387	0.695	0.114	1.69837e-188	sphincter_muscle_1	Acss1
3.44829e-149	2.46317	0.543	0.017	8.12279e-145	sphincter_muscle_1	Lrrtm3
1.7609e-144	2.42696	0.591	0.087	4.14798e-140	sphincter_muscle_1	Kctd16

## Sheet: sphincter_muscle_2
p_val	avg_log2FC	pct.1	pct.2	p_val_adj	cluster	gene
0	2.60446	0.972	0.292	0	sphincter_muscle_2	Synpo2
0	2.45852	0.98	0.389	0	sphincter_muscle_2	Rbm24
0	2.35949	0.976	0.29	0	sphincter_muscle_2	Dgki
0	2.23091	0.987	0.414	0	sphincter_muscle_2	Carmn
0	2.03309	0.996	0.422	0	sphincter_muscle_2	Myh11
9.32527e-297	1.92159	0.993	0.754	2.19666e-292	sphincter_muscle_2	Pcdh7
5.90497e-289	1.85451	0.976	0.576	1.39097e-284	sphincter_muscle_2	Tpm1
4.45681e-271	2.24436	0.951	0.43	1.04985e-266	sphincter_muscle_2	Esyt2
1.61139e-268	1.99352	0.945	0.337	3.79579e-264	sphincter_muscle_2	Acta2
2.52674e-255	1.85822	0.941	0.402	5.95199e-251	sphincter_muscle_2	Flna
1.14175e-223	3.10228	0.867	0.094	2.6895e-219	sphincter_muscle_2	Syt1
8.73299e-222	1.89543	0.902	0.284	2.05714e-217	sphincter_muscle_2	Ryr3
9.48792e-210	2.54007	0.858	0.164	2.23497e-205	sphincter_muscle_2	Hhip
1.57264e-181	1.96825	0.801	0.131	3.70451e-177	sphincter_muscle_2	Rab3c
2.26947e-172	1.91151	0.892	0.429	5.34595e-168	sphincter_muscle_2	Macrod2
1.276e-171	2.10048	0.864	0.367	3.00575e-167	sphincter_muscle_2	Nav3
2.86578e-171	2.53989	0.754	0.053	6.75064e-167	sphincter_muscle_2	Myocd
1.645e-144	1.94031	0.802	0.287	3.87496e-140	sphincter_muscle_2	Lmo4
3.4774e-142	1.92409	0.795	0.263	8.19136e-138	sphincter_muscle_2	Negr1
1.24852e-97	1.90023	0.566	0.083	2.94102e-93	sphincter_muscle_2	Wif1

## Sheet: stroma_1
p_val	avg_log2FC	pct.1	pct.2	p_val_adj	cluster	gene
0	5.14774	0.998	0.105	0	stroma_1	Fmn1
0	5.11182	0.996	0.134	0	stroma_1	Chsy3
0	4.52301	0.98	0.04	0	stroma_1	Gm13963
0	4.31946	0.987	0.14	0	stroma_1	Gm4876
0	4.03661	0.973	0.125	0	stroma_1	Sgcd
0	3.71873	0.953	0.084	0	stroma_1	Aff3
0	3.71723	0.985	0.244	0	stroma_1	Rapgef4
0	3.66971	0.985	0.251	0	stroma_1	Met
0	3.6687	0.996	0.4	0	stroma_1	Dlc1
0	3.61074	0.859	0.006	0	stroma_1	Pax3
0	3.59413	0.838	0.009	0	stroma_1	Gm26688
0	3.41414	0.882	0.089	0	stroma_1	Kcnj13
0	3.27819	0.831	0.009	0	stroma_1	Sox10
0	3.27191	0.854	0.02	0	stroma_1	Rasgrp3
0	3.26919	0.872	0.076	0	stroma_1	Dclk1
0	3.20654	0.833	0.034	0	stroma_1	Nrcam
0	3.12714	0.778	0.016	0	stroma_1	Ednrb
0	3.04536	0.894	0.098	0	stroma_1	Itga9
0	2.98829	0.882	0.161	0	stroma_1	Mgat5
0	2.96112	0.838	0.088	0	stroma_1	Arhgef37

## Sheet: stroma_2
p_val	avg_log2FC	pct.1	pct.2	p_val_adj	cluster	gene
0	4.64199	0.944	0.041	0	stroma_2	Tfap2b
0	4.54758	0.854	0.17	0	stroma_2	Ptn
0	4.40793	0.969	0.365	0	stroma_2	Cacna2d1
0	4.21398	0.861	0.043	0	stroma_2	Gm43824
0	3.98739	0.927	0.191	0	stroma_2	Ogfrl1
0	3.98319	0.898	0.11	0	stroma_2	Plcxd3
0	3.65152	0.787	0.103	0	stroma_2	Dcn
0	3.57499	0.918	0.157	0	stroma_2	Cdh11
0	3.54014	0.815	0.03	0	stroma_2	Glis1
0	3.50683	0.919	0.142	0	stroma_2	Eya2
0	3.497	0.784	0.055	0	stroma_2	Dkk2
0	3.45567	0.514	0.147	0	stroma_2	Pcdh15
0	3.42486	0.565	0.086	0	stroma_2	Nrxn1
0	3.39836	0.738	0.033	0	stroma_2	Itgbl1
0	3.38828	0.643	0.118	0	stroma_2	Igf1
0	3.36541	0.732	0.12	0	stroma_2	Slco3a1
0	3.30398	0.988	0.431	0	stroma_2	Lsamp
0	3.29668	0.861	0.206	0	stroma_2	Plxna2
0	3.17785	0.677	0.018	0	stroma_2	Pdgfra
0	2.9642	0.603	0.07	0	stroma_2	Enpp2

## Sheet: CB
p_val	avg_log2FC	pct.1	pct.2	p_val_adj	cluster	gene
0	3.92429	0.995	0.374	0	CB	Slc4a4
0	3.25945	0.9	0.084	0	CB	Rgs6
0	3.15843	0.936	0.194	0	CB	Anks1b
0	3.08069	0.775	0.009	0	CB	Gm34609
0	2.96647	0.952	0.401	0	CB	Kcnq5
0	2.80805	0.783	0.068	0	CB	Dab1
0	2.77884	0.832	0.106	0	CB	Cacng4
0	2.77796	0.988	0.525	0	CB	Pld5
0	2.74597	0.816	0.14	0	CB	Igfbp5
0	2.54894	0.84	0.167	0	CB	Pde5a
0	2.48066	0.949	0.266	0	CB	Tmem132d
0	2.31776	0.875	0.256	0	CB	Gabrb3
0	2.23843	0.881	0.262	0	CB	Grm7
0	2.21035	0.961	0.43	0	CB	Etl4
0	2.16609	0.875	0.353	0	CB	Nhs
0	2.15634	0.891	0.319	0	CB	Otx2os1
1.32031e-298	2.44961	0.768	0.139	3.11013e-294	CB	Ppp2r2b
2.14823e-253	2.29935	0.707	0.113	5.06036e-249	CB	Thsd4
4.0508e-237	2.20008	0.665	0.084	9.54206e-233	CB	Zfp385b
2.63529e-156	2.21209	0.639	0.218	6.2077e-152	CB	Pde10a

## Sheet: IPE
p_val	avg_log2FC	pct.1	pct.2	p_val_adj	cluster	gene
0	3.18473	0.856	0.191	0	IPE	Cdh18
0	2.87761	0.764	0.06	0	IPE	Crb1
0	2.72557	0.639	0.053	0	IPE	Matn3
0	2.52055	0.827	0.083	0	IPE	Zic1
0	2.46814	0.723	0.062	0	IPE	Tbx20
0	2.31589	0.759	0.067	0	IPE	Zic4
0	2.28345	0.886	0.271	0	IPE	Epha5
0	2.25925	0.931	0.242	0	IPE	Cadm2
0	2.25581	0.931	0.143	0	IPE	Mecom
0	2.22533	0.86	0.323	0	IPE	Sorcs1
0	2.18367	0.86	0.214	0	IPE	Tnr
0	2.05022	0.689	0.123	0	IPE	Wnt16
0	2.02069	0.566	0.043	0	IPE	Bmpr1b
0	1.95629	0.952	0.405	0	IPE	Sntg1
0	1.91935	0.994	0.416	0	IPE	Trpm3
0	1.90886	0.864	0.355	0	IPE	2610037D02Rik
0	1.87102	0.723	0.148	0	IPE	Scel
0	1.8564	0.993	0.77	0	IPE	Ptgds
0	1.85078	0.952	0.434	0	IPE	Pcdh9
0	1.76441	0.458	0.058	0	IPE	Ano4

## Sheet: CBE
p_val	avg_log2FC	pct.1	pct.2	p_val_adj	cluster	gene
0	4.1868	0.987	0.262	0	CBE	Sned1
0	3.95571	0.907	0.244	0	CBE	Slc6a6
0	3.07484	0.995	0.306	0	CBE	Frmpd4
0	2.88672	0.878	0.138	0	CBE	Fbln1
0	2.87059	0.849	0.103	0	CBE	Col18a1
0	2.73521	0.869	0.15	0	CBE	Csmd3
0	2.56112	1	0.546	0	CBE	Trpm3
0	2.54757	0.805	0.148	0	CBE	Tprkb
0	2.46429	0.839	0.105	0	CBE	Podxl2
0	2.46122	0.92	0.361	0	CBE	Tmtc4
0	2.33807	0.947	0.267	0	CBE	Atp1a2
0	2.33303	0.928	0.218	0	CBE	Rmst
0	2.2302	0.861	0.24	0	CBE	Esrrg
3E-323	2.76487	0.858	0.33	6.98293e-319	CBE	Pde1a
9.3773e-287	2.4111	0.744	0.09	2.20892e-282	CBE	Rgs6
7.18809e-278	2.44499	0.685	0.022	1.69323e-273	CBE	Slc13a4
6.03158e-237	2.42383	0.697	0.132	1.4208e-232	CBE	Adamtsl1
3.55773e-214	2.73826	0.595	0.027	8.3806e-210	CBE	Megf11
2.34429e-196	2.1554	0.588	0.06	5.52221e-192	CBE	Gldc
1.79396e-143	2.163	0.442	0.015	4.22584e-139	CBE	Slc6a13
