# Supplementary material for: A transcriptome atlas of the mouse iris at single-cell resolution defines cell types and the genomic response to pupil dilation
Source: eLife. 2021 Nov 16;10:e73477. doi: 10.7554/eLife.73477 (PMC8594943; doi:10.7554/eLife.73477)
Supplement: Supplementary file 3. — For each cell type, the table includes the 25 transcripts that showed the greatest fold increase and the 25 transcripts that showed the greatest fold decrease. FC, fold change (Excel File). [file elife-73477-supp3.xlsx]

## Sheet: dilator_muscle
gene	p_val	avg_log2FC	pct.1_dilated	pct.2_control	p_val_adj
Pde10a	0	3.60563	0.784	0.051	0
Btg2	0	2.24607	0.434	0.038	0
Slc26a4	0	1.92116	0.537	0.079	0
Mat2a	0	1.86968	0.777	0.331	0
Anks1b	0	1.84706	0.575	0.162	0
Rai14	0	1.82846	0.948	0.747	0
Gpnmb	0	1.79173	0.995	0.957	0
Neat1	0	1.75373	0.987	0.875	0
Plat	0	1.61936	0.494	0.118	0
Dbi	9.53395e-307	1.50717	0.577	0.219	2.24582e-302
Cadps	2.12231682851766e-312	1.49484	0.726	0.414	4.99933e-308
Tagln	1.51718e-264	1.48109	0.802	0.579	3.57387e-260
Junb	2.58942e-248	1.47842	0.357	0.052	6.09963e-244
Tmem158	0	1.46934	0.415	0.026	0
Pde7b	4.10711e-195	1.39919	0.407	0.132	9.6747e-191
Nr4a1	9.0673e-197	1.34779	0.276	0.032	2.13589e-192
Srgap1	8.02988676876206e-313	1.32708	0.559	0.185	0
Egr1	1.95257e-268	1.2499	0.301	0.006	4.59948e-264
Rab3b	2.74663e-198	1.19168	0.404	0.125	6.46996e-194
Ttc23l	1.05772e-220	1.18976	0.288	0.025	2.49158e-216
Jun	2.12372e-247	1.18212	0.466	0.137	5.00265e-243
Mt1	4.14724e-199	1.17596	0.829	0.64	9.76923e-195
Aqp1	6.35069e-259	1.16355	0.403	0.08	1.49597e-254
Slc38a2	1.00507e-283	1.14458	0.897	0.72	2.36755e-279
Prune2	4.61487e-240	1.13983	0.825	0.599	1.08708e-235
Ppm1e	7.51931e-240	1.1244	0.51	0.177	1.77125e-235
Bach2	2.14589e-197	1.12158	0.419	0.135	5.05486e-193
Wif1	1.2175e-171	1.11086	0.388	0.133	2.86795e-167
Clic4	6.67224e-195	1.09619	0.467	0.18	1.57171e-190
Gem	2.54246e-129	1.08988	0.479	0.259	5.98902e-125
Meg3	2.43033e-80	1.07952	0.165	0.04	5.72489e-76
Vat1l	4.01598e-218	1.06964	0.729	0.463	9.46005e-214
Zbtb16	6.00238e-238	1.05757	0.458	0.136	1.41392e-233
Htr4	6.8678e-191	1.05056	0.416	0.136	1.61778e-186
Syne1	4.55098e-261	1.03945	0.788	0.521	1.07203e-256
Cacna2d3	2.84301e-247	1.03366	0.664	0.349	6.69699e-243
Vim	6.92563e-215	1.02873	0.45	0.148	1.6314e-210
Cyr61	9.01433e-123	1.01988	0.204	0.036	2.12341e-118
Ctsb	7.59054e-263	1.00522	0.712	0.392	1.78803e-258
Col4a2	7.51277e-207	1.00003	0.326	0.059	1.76971e-202
Myh9	2.69303e-168	0.9957	0.614	0.363	6.34371e-164
Bmp2k	5.1237e-206	0.991107	0.415	0.127	1.20694e-201
Pdlim5	5.69846e-170	0.984047	0.574	0.305	1.34233e-165
Adgrl3	7.48869e-199	0.966219	0.69	0.411	1.76404e-194
Prr16	1.23473e-119	0.951006	0.365	0.153	2.90853e-115
Arid5b	6.46172e-145	0.94473	0.744	0.557	1.52212e-140
Vcl	7.33639e-171	0.941186	0.69	0.432	1.72816e-166
Ildr2	3.01863e-153	0.940727	0.508	0.26	7.11069e-149
Ugcg	5.48166e-165	0.926651	0.541	0.27	1.29126e-160
Mt2	3.49403e-134	0.922896	0.462	0.225	8.23053e-130
Ppargc1a	1.10277e-73	0.919267	0.52	0.365	2.59768e-69
Slc6a6	5.67792e-189	0.9118	0.472	0.181	1.33749e-184
Osbpl3	4.44274e-194	0.910287	0.295	0.045	1.04653e-189
Lncpint	4.25214e-191	0.907798	0.89	0.742	1.00163e-186
Fbxo32	3.39995e-166	0.905369	0.77	0.565	8.00893e-162
Mylip	2.85479e-177	0.902486	0.316	0.07	6.72475e-173
Pdlim3	4.34922e-89	0.897651	0.46	0.287	1.0245e-84
Pdpn	6.49258e-142	0.887755	0.615	0.372	1.52939e-137
Abca1	5.61647e-171	0.884625	0.425	0.155	1.32302e-166
Mgll	1.16263e-250	0.883259	0.995	0.997	2.7387e-246
Csrp1	1.92236e-102	0.870009	0.479	0.283	4.52831e-98
Sik1	1.17677e-139	0.85797	0.218	0.032	2.772e-135
Homer1	2.24097e-108	0.854916	0.265	0.085	5.27883e-104
Slc2a1	3.59413e-182	0.853247	0.822	0.609	8.46634e-178
Pgm5	1.0568e-144	0.845046	0.253	0.049	2.48939e-140
Mcl1	7.51706e-178	0.837476	0.403	0.13	1.77072e-173
Sgip1	9.63965e-154	0.811345	0.821	0.649	2.27071e-149
Gcnt2	5.15632e-126	0.801546	0.69	0.479	1.21462e-121
Plekhm2	1.14275e-176	0.797231	0.738	0.482	2.69186e-172
Gab2	1.71502e-103	0.786176	0.542	0.333	4.0399e-99
Fos	3.14561e-122	0.783191	0.152	0.004	7.4098e-118
Actn1	3.43405e-137	0.778723	0.59	0.345	8.08925e-133
Jund	5.64129e-132	0.778622	0.458	0.216	1.32886e-127
Actg1	9.51472e-147	0.777854	0.648	0.401	2.24129e-142
Tnfrsf12a	7.17049e-158	0.77573	0.189	0.006	1.68908e-153
Spred2	3.77074e-169	0.76829	0.218	0.016	8.88235e-165
Rpl10a	4.48397e-152	0.762971	0.483	0.217	1.05624e-147
Lgals3	1.23824e-145	0.761106	0.266	0.056	2.9168e-141
Ltbp1	1.45699e-123	0.76057	0.269	0.071	3.43208e-119
Tpm4	1.16937e-133	0.747691	0.351	0.126	2.75456e-129
Zbtb7c	1.86958e-102	0.746957	0.256	0.08	4.40399e-98
Nceh1	7.43319e-122	0.737877	0.367	0.148	1.75096e-117
Pde3b	1.78902e-133	0.737163	0.2	0.025	4.21422e-129
Aig1	4.75524e-129	0.736115	0.626	0.392	1.12014e-124
Ptp4a2	2.22692e-134	0.733977	0.625	0.384	5.24574e-130
Kcnd3	7.36433e-111	0.73296	0.239	0.064	1.73474e-106
Cald1	1.4574e-138	0.728979	0.887	0.773	3.43306e-134
Tpt1	5.36228e-142	0.727389	0.7	0.457	1.26314e-137
Tbl1x	4.19501e-146	0.727245	0.555	0.285	9.88177e-142
Limk2	8.19258e-110	0.724981	0.684	0.497	1.92984e-105
Crim1	3.71888e-94	0.72479	0.618	0.428	8.76019e-90
Rbms1	7.62429e-177	0.72271	0.967	0.916	1.79598e-172
Erc1	2.19177e-104	0.718444	0.517	0.306	5.16293e-100
Igfbp2	1.23908e-86	0.717213	0.18	0.044	2.91877e-82
Itgb1	2.20408e-132	0.704559	0.584	0.336	5.19193e-128
Stat3	3.12603e-102	0.70226	0.631	0.423	7.36368e-98
Gm43150	7.1729e-87	0.695683	0.251	0.093	1.68965e-82
Gsdme	3.30175e-200	0.681181	0.974	0.905	7.77759e-196
Ppp1cc	7.22478e-120	0.68054	0.533	0.297	1.70187e-115
Akap13	1.4612e-83	0.677018	0.524	0.331	3.44199e-79
Id3	1.93314e-80	0.675406	0.494	0.303	4.55371e-76
Fkbp5	3.19796e-119	0.673962	0.224	0.045	7.53311e-115
Whrn	2.47771e-102	0.672218	0.354	0.153	5.8365e-98
Tagln2	6.26116e-118	0.670421	0.214	0.042	1.47488e-113
Ubc	2.24987e-108	0.666277	0.533	0.31	5.29979e-104
Picalm	2.51461e-104	0.658409	0.45	0.236	5.92343e-100
Chka	3.924e-95	0.657176	0.588	0.386	9.24336e-91
Rcn1	1.1215e-116	0.649611	0.271	0.079	2.6418e-112
Atp1a1	9.30181e-114	0.648481	0.48	0.249	2.19114e-109
Cpne5	2.06086e-104	0.648236	0.273	0.088	4.85455e-100
Agpat4	5.0116e-108	0.644799	0.396	0.18	1.18053e-103
Col4a1	2.5915e-112	0.644513	0.162	0.016	6.10454e-108
Stac	2.44942e-74	0.643979	0.491	0.307	5.76986e-70
Rasa2	3.81884e-112	0.64145	0.366	0.148	8.99567e-108
Mad1l1	3.02458e-65	0.641145	0.656	0.499	7.12471e-61
Map2	6.61861e-61	0.63193	0.6	0.462	1.55908e-56
Fam129a	4.83687e-78	0.628336	0.908	0.849	1.13937e-73
Gramd3	4.3423e-78	0.62823	0.378	0.205	1.02287e-73
Myo1e	6.74545e-95	0.628193	0.39	0.186	1.58896e-90
Medag	7.65047e-81	0.627203	0.267	0.108	1.80214e-76
Rbms3	9.98789e-61	0.625774	0.34	0.189	2.35275e-56
Lgals1	1.7808e-89	0.625585	0.522	0.322	4.19485e-85
Slc3a2	9.44098e-76	0.621985	0.56	0.389	2.22392e-71
Trib1	8.17021e-113	0.618316	0.197	0.036	1.92457e-108
Map1b	2.20908e-68	0.617564	0.548	0.374	5.2037e-64
Rapgef4	3.6636e-69	0.617357	0.469	0.299	8.62997e-65
Hsp90ab1	7.54591e-97	0.614561	0.406	0.203	1.77751e-92
Tspan7	1.99826e-61	0.612495	0.412	0.259	4.70709e-57
Tmem132d	3.36508e-22	0.608429	0.186	0.118	7.92679e-18
Pde1c	2.86619e-106	0.603559	0.835	0.679	6.75159e-102
Zdhhc14	4.76908e-101	0.600397	0.217	0.052	1.12341e-96
Carmn	2.74428e-125	-0.600088	0.715	0.86	6.46443e-121
Add3	3.52305e-82	-0.601544	0.18	0.349	8.29889e-78
Foxp2	9.71731e-189	-0.602271	0.936	0.982	2.28901e-184
Nos1	1.93725e-86	-0.605913	0.314	0.503	4.56339e-82
Sec62	2.70261e-92	-0.606481	0.442	0.624	6.36626e-88
Pdk2	3.18024e-97	-0.609097	0.225	0.422	7.49138e-93
Fam69a	4.08694e-78	-0.611597	0.266	0.434	9.6272e-74
Macrod2	7.32392e-67	-0.611954	0.408	0.555	1.72522e-62
Mfap3l	5.17868e-91	-0.612693	0.145	0.321	1.21989e-86
Smyd3	1.45523e-104	-0.615758	0.597	0.759	3.42793e-100
Nkd1	1.38183e-91	-0.618713	0.121	0.287	3.25504e-87
Ank2	7.4187e-150	-0.619954	0.906	0.964	1.74755e-145
Reep1	9.56696e-92	-0.622054	0.155	0.338	2.25359e-87
St6galnac3	2.44971e-88	-0.627676	0.259	0.456	5.77053e-84
Lipc	4.73879e-91	-0.629259	0.144	0.316	1.11627e-86
Dzip1	2.13842e-100	-0.635195	0.164	0.353	5.03727e-96
Kcnip4	6.08923e-189	-0.639946	0.947	0.992	1.43438e-184
Cadm2	2.24886e-69	-0.640111	0.132	0.279	5.29742e-65
Ankrd44	1.02784e-156	-0.642295	0.864	0.955	2.42118e-152
Hs6st3	3.54345e-72	-0.646067	0.205	0.371	8.34695e-68
Col4a6	3.39159e-132	-0.646665	0.594	0.792	7.98923e-128
Fdft1	8.90112e-96	-0.650273	0.149	0.328	2.09675e-91
Wnt5b	5.4729e-82	-0.651127	0.129	0.292	1.2892e-77
Pole4	1.65056e-93	-0.652376	0.157	0.332	3.88806e-89
Rora	3.10647e-231	-0.652988	0.883	0.982	7.31759e-227
Xkr4	2.7003e-94	-0.655355	0.377	0.579	6.36083e-90
Cped1	6.79245e-96	-0.655668	0.294	0.491	1.60003e-91
9630028H03Rik	1.63647e-31	-0.656637	0.269	0.364	3.85488e-27
Tacr1	9.57956e-73	-0.66231	0.089	0.225	2.25656e-68
Asap1	4.49853e-125	-0.664408	0.627	0.787	1.05967e-120
Plk5	3.41599e-126	-0.667237	0.051	0.227	8.04671e-122
Bnc2	3.9233e-141	-0.667421	0.721	0.862	9.24172e-137
Thrb	2.37366e-169	-0.667723	0.882	0.952	5.59139e-165
Thap3	4.29361e-113	-0.671039	0.338	0.553	1.0114e-108
Cacna1d	8.07239e-97	-0.674479	0.342	0.531	1.90153e-92
Rbm24	2.85429e-113	-0.674512	0.588	0.759	6.72357e-109
Dpp6	1.14586e-95	-0.674914	0.157	0.338	2.69918e-91
Ahcyl2	1.51783e-143	-0.675365	0.736	0.878	3.57539e-139
Phactr1	1.0741e-92	-0.679553	0.195	0.38	2.53015e-88
Adarb2	6.39526e-62	-0.683006	0.047	0.143	1.50647e-57
Bfsp2	2.4797e-132	-0.685285	0.525	0.73	5.84119e-128
Antxr1	2.86987e-114	-0.689157	0.322	0.539	6.76025e-110
Ogt	5.03824e-138	-0.689547	0.56	0.749	1.18681e-133
Nrep	2.52819e-114	-0.691264	0.156	0.358	5.95539e-110
Ociad2	2.30286e-124	-0.695761	0.403	0.619	5.42461e-120
Myh11	1.35895e-147	-0.70185	0.862	0.924	3.20115e-143
Plcb4	1.15601e-209	-0.702283	0.937	0.982	2.7231e-205
Nckap5	6.57528e-105	-0.703345	0.134	0.325	1.54887e-100
Tef	3.05163e-138	-0.712293	0.082	0.286	7.18842e-134
Cracr2a	9.27927e-126	-0.715134	0.077	0.267	2.18583e-121
Mcc	6.53976e-146	-0.721072	0.55	0.757	1.54051e-141
Cfap54	1.41555e-166	-0.723927	0.75	0.883	3.33448e-162
Sorcs1	6.38017e-89	-0.725265	0.285	0.467	1.50291e-84
Lmo2	7.21871e-113	-0.729839	0.322	0.528	1.70044e-108
Arap2	1.67615e-120	-0.734223	0.388	0.592	3.94834e-116
Rap1gap	2.61496e-139	-0.749359	0.176	0.41	6.1598e-135
Car14	1.13494e-141	-0.751557	0.101	0.312	2.67347e-137
Vsnl1	1.18136e-117	-0.753775	0.183	0.4	2.78281e-113
Rab30	2.30489e-139	-0.758483	0.312	0.552	5.4294e-135
Kalrn	1.10701e-97	-0.759049	0.396	0.565	2.60767e-93
Ldlr	4.34144e-121	-0.764068	0.207	0.425	1.02267e-116
Klhl1	1.10802e-110	-0.765308	0.191	0.392	2.61006e-106
Dock5	1.7499e-149	-0.767765	0.46	0.683	4.12206e-145
Adam10	1.70155e-172	-0.778296	0.622	0.812	4.00817e-168
Kcnj3	1.90033e-99	-0.781589	0.181	0.367	4.47641e-95
Ablim3	5.79817e-145	-0.785894	0.196	0.441	1.36582e-140
Slc35f1	8.09827e-130	-0.788975	0.425	0.645	1.90763e-125
Sybu	1.3247e-148	-0.793641	0.263	0.519	3.12047e-144
Dpyd	4.53133e-126	-0.798673	0.188	0.401	1.0674e-121
Dse	8.25376e-136	-0.800698	0.344	0.572	1.94425e-131
Col4a5	6.36647e-186	-0.808675	0.577	0.8	1.49969e-181
Lrig1	8.49463e-146	-0.811743	0.205	0.44	2.00099e-141
Slc7a2	5.97017e-151	-0.818849	0.269	0.515	1.40633e-146
Plxna4	4.15925e-142	-0.822908	0.171	0.405	9.79753e-138
Sort1	4.46751e-174	-0.826814	0.431	0.677	1.05237e-169
Dgki	4.86768e-112	-0.839395	0.539	0.683	1.14663e-107
Tmtc2	7.60652e-181	-0.844299	0.654	0.839	1.79179e-176
Myl9	4.22717e-208	-0.850279	0.461	0.745	9.95751e-204
Slc24a3	8.11304e-163	-0.850818	0.374	0.633	1.91111e-158
Fhit	1.70044e-172	-0.865741	0.575	0.776	4.00555e-168
Il1rapl1	8.63736e-239	-0.8742	0.69	0.896	2.03462e-234
Dpp4	9.67153e-212	-0.887105	0.455	0.727	2.27823e-207
Park2	7.38287e-204	-0.89812	0.492	0.739	1.73911e-199
Tenm2	8.10613e-135	-0.899663	0.168	0.391	1.90948e-130
Map2k6	5.14314e-205	-0.904986	0.077	0.34	1.21152e-200
Tacr3	6.52849e-135	-0.905754	0.352	0.566	1.53785e-130
Kctd8	1.95983e-166	-0.910746	0.426	0.675	4.61657e-162
Hhip	1.41132e-150	-0.912556	0.234	0.481	3.32451e-146
Mid1	7.82798e-266	-0.912679	0.748	0.919	1.84396e-261
Chrm2	6.57062e-133	-0.93305	0.406	0.62	1.54778e-128
Lrig3	3.04458e-208	-0.947309	0.265	0.554	7.17182e-204
Rab38	3.43027e-176	-0.950493	0.13	0.378	8.08034e-172
Lrmda	2.43125e-270	-0.960554	0.646	0.88	5.72705e-266
Pdgfa	4.68726e-251	-0.964866	0.604	0.816	1.10413e-246
Myo18a	3.94161e-275	-0.971949	0.515	0.796	9.28486e-271
Fryl	0	-0.984039	0.875	0.972	0
Gria4	4.91256e-169	-0.993785	0.167	0.418	1.1572e-164
Gja1	1.01923e-265	-0.996785	0.625	0.859	2.40089e-261
Sntg1	8.07073e-203	-1.02481	0.223	0.524	1.90114e-198
Tbxas1	3.18661e-225	-1.02971	0.111	0.396	7.50638e-221
Emilin3	1.00664e-246	-1.0711	0.061	0.344	2.37124e-242
Ntng1	4.15936e-186	-1.09959	0.154	0.426	9.79779e-182
Nav3	1.64416e-236	-1.1142	0.333	0.626	3.87299e-232
B3glct	0	-1.13006	0.485	0.807	0
4930435M08Rik	5.01201e-175	-1.15717	0.41	0.648	1.18063e-170
AC159282.1	1.85402e-283	-1.15725	0.251	0.593	4.36734e-279
Nlgn1	1.06601e-254	-1.17333	0.431	0.726	2.51109e-250
Appl2	0	-1.21172	0.459	0.821	0
Robo2	0	-1.28294	0.341	0.723	0
AC129186.1	0	-1.35748	0.509	0.855	0
Il1rapl2	7.38105e-203	-1.38063	0.201	0.46	1.73868e-198
Synpr	0	-1.46563	0.611	0.915	0
Npsr1	0	-1.48936	0.618	0.909	0
Unc13c	0	-1.62539	0.711	0.971	0
Tyr	0	-1.78374	0.463	0.859	0

## Sheet: sphincter_muscle_1
gene	p_val	avg_log2FC	pct.1_dilated	pct.2_control	p_val_adj
Tagln	1.48814e-33	1.19705	0.94	0.812	3.50546e-29
Csrp1	2.23061e-18	1.11037	0.796	0.562	5.25443e-14
Txnip	2.06953e-16	0.967162	0.66	0.392	4.87499e-12
Prdx6	2.91419e-12	0.957621	0.515	0.274	6.86466e-08
Pde3b	4.51487e-11	0.950634	0.247	0.044	1.06352e-06
Pde10a	6.66389e-10	0.936677	0.247	0.062	1.56975e-05
Pappa	2.4649e-07	0.887204	0.409	0.241	0.00580632
Fkbp5	6.1041e-11	0.869962	0.268	0.062	1.43788e-06
Gpnmb	3.48389e-07	0.817414	0.494	0.309	0.00820665
Prune2	1.3091e-14	0.802235	0.889	0.77	3.08372e-10
4933406I18Rik	5.25359e-09	0.785728	0.213	0.039	0.000123754
Pld5	9.73934e-07	0.777127	0.391	0.23	0.022942
Hif3a	2.02385e-08	0.745374	0.306	0.121	0.000476737
Sorbs1	1.57991e-13	0.736423	0.889	0.754	3.72163e-09
Zhx3	4.4061e-08	0.711212	0.421	0.239	0.0010379
Zbtb16	4.05302e-09	0.682189	0.391	0.178	9.5473e-05
Tbc1d1	2.46487e-09	0.661373	0.885	0.814	5.80624e-05
Pax6	1.51864e-21	0.652128	0.991	0.949	3.57731e-17
Sparc	1.40442e-07	0.624127	0.4	0.206	0.00330825
Nav1	1.06626e-06	0.61776	0.757	0.662	0.0251169
Pgm5	9.29343e-08	0.614168	0.668	0.502	0.00218916
Mxra7	1.3273e-09	0.612065	0.587	0.369	3.12658e-05
Pde4d	3.50296e-21	0.606377	1	0.991	8.25157e-17
Iqsec1	6.6044e-10	-0.604972	0.153	0.336	1.55573e-05
Atcayos	3.80739e-09	-0.606142	0.311	0.518	8.96868e-05
Clic4	2.21113e-08	-0.608105	0.289	0.485	0.000520854
Dysf	1.03944e-09	-0.609492	0.255	0.461	2.44851e-05
Shroom3	1.25648e-07	-0.611073	0.26	0.436	0.00295976
Tacr3	2.93749e-11	-0.611491	0.723	0.893	6.91956e-07
Gucy1a1	1.64446e-11	-0.612244	0.077	0.256	3.8737e-07
Podxl2	7.43528e-11	-0.612866	0.094	0.267	1.75145e-06
Hdac9	2.41039e-10	-0.615186	0.677	0.846	5.67792e-06
Astn2	3.88501e-09	-0.624509	0.374	0.581	9.15152e-05
Amph	8.1102e-12	-0.627552	0.54	0.774	1.91044e-07
Cmya5	4.60447e-11	-0.628709	0.123	0.324	1.08463e-06
Cntn4	7.56737e-08	-0.631382	0.626	0.75	0.00178257
Trim55	2.10407e-11	-0.643447	0.034	0.171	4.95635e-07
Fam13c	8.53343e-10	-0.645983	0.289	0.482	2.01013e-05
Bzw2	2.8486e-09	-0.651192	0.226	0.408	6.71016e-05
Pcdh15	1.71221e-07	-0.651856	0.357	0.526	0.00403328
Tmem38a	1.0097e-08	-0.660618	0.2	0.371	0.000237845
Galnt18	3.44564e-11	-0.661458	0.106	0.292	8.11656e-07
Ptp4a3	4.07407e-14	-0.664181	0.051	0.219	9.59687e-10
Colgalt2	3.87324e-11	-0.667907	0.115	0.311	9.12379e-07
Ehd4	5.88132e-10	-0.669533	0.123	0.29	1.3854e-05
Inpp5a	4.40218e-12	-0.683477	0.319	0.559	1.03698e-07
Ramp1	6.71249e-14	-0.684902	0.077	0.27	1.5812e-09
Baiap2l1	9.90919e-12	-0.685541	0.204	0.436	2.33421e-07
Rbfox1	1.22618e-13	-0.697509	0.051	0.21	2.88838e-09
Myl1	7.11499e-11	-0.699049	0.038	0.178	1.67601e-06
Casq2	1.78237e-12	-0.702375	0.085	0.263	4.19855e-08
Nr3c2	4.05495e-11	-0.703978	0.272	0.504	9.55183e-07
Ccdc141	9.03649e-14	-0.706932	0.617	0.829	2.12863e-09
Arhgap6	1.27692e-11	-0.707752	0.617	0.801	3.0079e-07
Wnk2	4.14059e-13	-0.71477	0.409	0.653	9.75358e-09
Flrt2	4.7181e-09	-0.715669	0.162	0.329	0.00011114
Tmtc1	1.82316e-11	-0.728259	0.187	0.404	4.29463e-07
Lama3	4.89992e-12	-0.729147	0.187	0.417	1.15422e-07
Sh3gl2	1.50987e-11	-0.732998	0.757	0.875	3.55665e-07
Lims1	4.90949e-13	-0.738884	0.634	0.822	1.15648e-08
Jph2	1.17866e-14	-0.7411	0.336	0.621	2.77645e-10
Bvht	2.57677e-14	-0.758414	0.43	0.68	6.06984e-10
Csrp2	1.96565e-16	-0.766515	0.791	0.923	4.63029e-12
Serpine2	3.33458e-12	-0.7679	0.157	0.364	7.85494e-08
Ppm1l	8.61346e-16	-0.768207	0.736	0.899	2.02899e-11
Ctnnd2	2.09518e-14	-0.768812	0.621	0.827	4.93541e-10
Cdyl	2.66931e-14	-0.78007	0.2	0.458	6.28782e-10
Rgs7	4.48346e-13	-0.785392	0.089	0.276	1.05612e-08
Fmn1	1.81569e-07	-0.788032	0.289	0.428	0.00427705
Dgkg	1.40675e-15	-0.788047	0.047	0.228	3.31374e-11
Ldb3	9.13863e-15	-0.797799	0.264	0.537	2.1527e-10
Thrb	9.28151e-21	-0.800843	0.855	0.971	2.18635e-16
Zfp36l1	1.12388e-13	-0.809785	0.153	0.369	2.6474e-09
Vps13b	4.22407e-18	-0.817452	0.63	0.866	9.95021e-14
Atp2a2	1.33756e-16	-0.824362	0.689	0.86	3.15076e-12
Lrrtm3	1.51521e-09	-0.827854	0.396	0.585	3.56923e-05
Carmn	1.0316e-28	-0.835781	0.953	0.998	2.43004e-24
Sema5a	2.39498e-16	-0.841673	0.57	0.796	5.64162e-12
Dmpk	7.83076e-16	-0.868567	0.17	0.41	1.84461e-11
Entpd3	8.41056e-22	-0.873677	0.034	0.25	1.98119e-17
Arhgap20	1.64031e-14	-0.879679	0.149	0.36	3.86391e-10
Sntg1	4.13844e-16	-0.889087	0.298	0.585	9.74851e-12
Col4a6	1.74607e-14	-0.90812	0.698	0.846	4.11304e-10
Pitpnc1	4.04169e-15	-0.915647	0.217	0.471	9.5206e-11
Thsd4	4.11847e-15	-0.927436	0.511	0.737	9.70148e-11
Kcnma1	7.07065e-22	-0.941319	0.694	0.888	1.66556e-17
Pcp4l1	3.76272e-21	-0.951374	0.162	0.46	8.86346e-17
Sparcl1	3.29772e-19	-0.962072	0.302	0.597	7.7681e-15
Mamdc2	1.0872e-18	-0.993909	0.294	0.594	2.56102e-14
Lrrc4c	4.18829e-11	-1.00674	0.74	0.818	9.86593e-07
Inpp4a	1.19923e-22	-1.01241	0.26	0.586	2.8249e-18
Serpini1	8.31182e-18	-1.01897	0.094	0.324	1.95793e-13
Sulf1	2.11703e-23	-1.02744	0.472	0.794	4.98688e-19
Plppr4	2.83984e-20	-1.08298	0.349	0.643	6.68953e-16
Ctnna3	2.12527e-16	-1.09226	0.66	0.824	5.00628e-12
Adamts5	4.81635e-23	-1.1064	0.528	0.8	1.13454e-18
Ppm1e	7.265e-26	-1.11363	0.37	0.71	1.71134e-21
Gm42397	2.04945e-22	-1.14385	0.294	0.634	4.82769e-18
Dgkb	5.54504e-19	-1.19887	0.311	0.575	1.30619e-14
Fam241a	3.38767e-31	-1.24463	0.166	0.529	7.97999e-27
Dlgap1	2.17573e-27	-1.30237	0.523	0.796	5.12514e-23
Cntn3	1.16027e-20	-1.31715	0.191	0.46	2.73313e-16
Chrm2	1.972e-25	-1.37431	0.128	0.428	4.64523e-21
Stac	5.20512e-34	-1.40759	0.319	0.704	1.22612e-29
Akap6	9.56669e-35	-1.44321	0.179	0.55	2.25353e-30
Klhl7	4.54613e-47	-1.49561	0.217	0.667	1.07089e-42
Ttn	1.08063e-20	-1.53371	0.579	0.728	2.54552e-16
Acss1	2.55482e-63	-1.84435	0.272	0.79	6.01814e-59

## Sheet: sphincter_muscle_2
	p_val	avg_log2FC	pct.1_dilated	pct.2_control	p_val_adj	gene
Pde10a	1.51221e-19	2.14424	0.497	0.043	3.56216e-15	Pde10a
Tmem158	1.64587e-25	2.03701	0.643	0.131	3.87701e-21	Tmem158
Cadps	2.55951e-13	1.48808	0.51	0.151	6.02918e-09	Cadps
Csrp2	1.27042e-22	1.44056	0.822	0.406	2.9926e-18	Csrp2
Gpnmb	1.28682e-17	1.39095	0.873	0.648	3.03123e-13	Gpnmb
Nr4a1	8.96409e-08	1.33847	0.191	0.006	0.00211158	Nr4a1
Gem	2.84462e-10	1.19524	0.389	0.105	6.7008e-06	Gem
Pdlim5	2.41695e-12	1.15124	0.624	0.307	5.69336e-08	Pdlim5
Acss1	3.43925e-13	1.14931	0.637	0.321	8.1015e-09	Acss1
Csrp1	8.62674e-13	1.14095	0.892	0.75	2.03212e-08	Csrp1
Rasl11b	3.16367e-10	1.13237	0.268	0.02	7.45233e-06	Rasl11b
Mgll	2.04903e-10	1.12797	0.924	0.906	4.82669e-06	Mgll
Itga5	3.93561e-10	1.12566	0.338	0.074	9.27073e-06	Itga5
Clic4	3.15392e-10	1.09348	0.554	0.284	7.42938e-06	Clic4
Zdhhc14	6.23812e-10	1.02605	0.42	0.148	1.46945e-05	Zdhhc14
Kcnma1	2.03963e-09	1.01102	0.471	0.196	4.80455e-05	Kcnma1
Exoc6b	9.90078e-20	0.969036	0.917	0.665	2.33223e-15	Exoc6b
Kcnd3	1.89229e-13	0.965958	0.726	0.415	4.45747e-09	Kcnd3
Fos	8.08932e-07	0.93488	0.172	0.009	0.0190552	Fos
Etv6	1.23359e-13	0.898541	0.752	0.452	2.90584e-09	Etv6
Arl4a	1.37916e-07	0.897554	0.65	0.452	0.00324875	Arl4a
Actn1	5.90817e-12	0.881718	0.796	0.545	1.39173e-07	Actn1
Zbtb16	5.72657e-09	0.871804	0.433	0.17	0.000134895	Zbtb16
Sorbs1	1.21247e-11	0.846211	0.898	0.753	2.85608e-07	Sorbs1
Cacna2d3	9.87184e-15	0.845735	0.873	0.685	2.32541e-10	Cacna2d3
Mat2a	3.61249e-10	0.809585	0.72	0.494	8.50959e-06	Mat2a
Nxn	4.45704e-13	0.808126	0.987	0.923	1.0499e-08	Nxn
Aqp1	9.78685e-09	0.796055	0.293	0.057	0.000230539	Aqp1
Mcl1	3.16217e-08	0.78639	0.312	0.088	0.000744882	Mcl1
Akap13	9.27346e-10	0.779154	0.72	0.472	2.18446e-05	Akap13
Neat1	5.723e-07	0.777692	0.745	0.588	0.0134811	Neat1
Rcn1	5.16264e-08	0.764482	0.338	0.105	0.00121611	Rcn1
Atp1a1	4.65246e-08	0.743745	0.427	0.182	0.00109593	Atp1a1
Tagln	3.42594e-09	0.736489	0.962	0.935	8.07015e-05	Tagln
Ubc	3.18e-07	0.732526	0.554	0.327	0.00749082	Ubc
Sik1	1.31603e-06	0.717432	0.178	0.02	0.0310004	Sik1
Pdlim3	1.78908e-07	0.698429	0.758	0.577	0.00421436	Pdlim3
Col4a2	1.33609e-06	0.686848	0.331	0.131	0.031473	Col4a2
Gcnt2	4.28046e-07	0.676022	0.707	0.506	0.0100831	Gcnt2
Sh3d19	2.33349e-07	0.669004	0.93	0.872	0.00549677	Sh3d19
Itgb1	3.4666e-08	0.661323	0.637	0.389	0.000816592	Itgb1
Synj2	1.18133e-06	0.63452	0.643	0.435	0.0278274	Synj2
Ppp1r12a	5.24021e-08	0.63065	0.968	0.96	0.00123438	Ppp1r12a
Svil	9.27982e-07	0.607755	0.739	0.548	0.0218595	Svil
Map2k6	1.34587e-06	-0.600231	0.127	0.293	0.0317033	Map2k6
Tmem132c	3.80391e-07	-0.600647	0.096	0.276	0.0089605	Tmem132c
Rora	1.2163e-11	-0.625794	0.898	0.983	2.86511e-07	Rora
Arhgap5	8.00897e-07	-0.627043	0.599	0.756	0.0188659	Arhgap5
Gm12681	6.85643e-07	-0.627809	0.146	0.327	0.016151	Gm12681
Mxra7	1.99358e-07	-0.633367	0.318	0.54	0.00469609	Mxra7
Fat3	5.02508e-07	-0.634953	0.07	0.213	0.0118371	Fat3
Msra	1.20355e-06	-0.642753	0.178	0.358	0.0283508	Msra
Zfp808	2.12243e-07	-0.647723	0.153	0.349	0.0049996	Zfp808
Tenm4	1.32049e-08	-0.65204	0.771	0.901	0.000311056	Tenm4
Gabrb2	8.3632e-07	-0.657476	0.076	0.236	0.0197004	Gabrb2
Ralgps2	3.2482e-07	-0.66031	0.121	0.293	0.00765146	Ralgps2
Il1rapl1	5.8281e-10	-0.664806	0.688	0.901	1.37287e-05	Il1rapl1
Slc39a12	8.50014e-08	-0.667452	0.35	0.574	0.00200229	Slc39a12
Gpm6a	1.35998e-06	-0.672966	0.255	0.443	0.0320356	Gpm6a
Plch1	5.16552e-07	-0.67716	0.51	0.685	0.0121679	Plch1
Cdh20	3.07297e-07	-0.677546	0.089	0.264	0.00723868	Cdh20
Cachd1	6.9941e-07	-0.678277	0.229	0.418	0.0164753	Cachd1
Lrmda	3.40712e-07	-0.67931	0.51	0.716	0.00802581	Lrmda
Gja1	1.74426e-07	-0.682245	0.618	0.804	0.00410877	Gja1
Nkd1	2.46027e-07	-0.690686	0.357	0.56	0.00579542	Nkd1
Mybpc1	9.90194e-07	-0.693605	0.369	0.565	0.023325	Mybpc1
Tyr	1.58939e-07	-0.697988	0.057	0.202	0.00374396	Tyr
Map7	1.0639e-06	-0.698425	0.306	0.5	0.0250611	Map7
Fryl	8.10753e-12	-0.707895	0.898	0.966	1.90981e-07	Fryl
Negr1	1.45814e-06	-0.71012	0.669	0.815	0.0343479	Negr1
Rab38	2.7061e-08	-0.711421	0.159	0.369	0.000637449	Rab38
Mid1	2.67036e-09	-0.713712	0.803	0.898	6.2903e-05	Mid1
Cpa6	3.766e-07	-0.714235	0.395	0.599	0.00887119	Cpa6
Tenm2	2.75896e-10	-0.715791	0.643	0.866	6.499e-06	Tenm2
Spock3	9.49183e-07	-0.720515	0.108	0.253	0.0223589	Spock3
Mei4	1.26427e-07	-0.721502	0.172	0.372	0.0029781	Mei4
Thrb	1.57757e-15	-0.721537	0.968	0.989	3.71613e-11	Thrb
Cd200	1.71977e-06	-0.721916	0.166	0.321	0.040511	Cd200
Kctd8	7.31189e-07	-0.727648	0.382	0.585	0.0172239	Kctd8
Greb1l	1.17559e-07	-0.736073	0.121	0.295	0.00276923	Greb1l
Nr6a1os	5.24411e-07	-0.759256	0.146	0.315	0.012353	Nr6a1os
Nox4	2.04186e-07	-0.760381	0.248	0.457	0.00480981	Nox4
Adam10	6.00081e-10	-0.766668	0.395	0.636	1.41355e-05	Adam10
Hunk	5.23877e-09	-0.772048	0.293	0.531	0.000123404	Hunk
Pcdh9	1.92329e-06	-0.77287	0.363	0.565	0.0453051	Pcdh9
Lmo4	3.60314e-09	-0.786279	0.72	0.844	8.48756e-05	Lmo4
Ahcyl2	3.36651e-08	-0.808194	0.541	0.733	0.000793015	Ahcyl2
Pld5	5.49865e-09	-0.810966	0.49	0.702	0.000129526	Pld5
Klf12	2.85296e-10	-0.818006	0.185	0.432	6.72043e-06	Klf12
Npsr1	9.88764e-07	-0.82938	0.096	0.233	0.0232913	Npsr1
Vsnl1	1.63107e-11	-0.832635	0.083	0.304	3.84216e-07	Vsnl1
Cntnap4	3.79021e-07	-0.840395	0.153	0.321	0.00892823	Cntnap4
Ldlr	1.33219e-11	-0.849797	0.07	0.273	3.1381e-07	Ldlr
Klhl1	5.17014e-10	-0.851903	0.261	0.523	1.21788e-05	Klhl1
Immp2l	1.2354e-07	-0.857041	0.357	0.54	0.0029101	Immp2l
Fhit	8.95574e-11	-0.876798	0.586	0.784	2.10961e-06	Fhit
Stxbp5l	7.01602e-11	-0.892368	0.497	0.741	1.65269e-06	Stxbp5l
Dach2	1.33481e-06	-0.895219	0.357	0.543	0.0314427	Dach2
Kctd16	3.06047e-09	-0.903275	0.057	0.227	7.20925e-05	Kctd16
Lrig1	4.86978e-11	-0.904009	0.357	0.605	1.14713e-06	Lrig1
Wdr17	6.45802e-15	-0.930051	0.726	0.926	1.52125e-10	Wdr17
Arap2	4.42073e-12	-0.952979	0.236	0.494	1.04135e-07	Arap2
Ntng1	7.61831e-11	-0.954848	0.389	0.659	1.79457e-06	Ntng1
Adarb2	1.98812e-09	-0.955013	0.185	0.426	4.68322e-05	Adarb2
Sybu	2.9531e-14	-0.963869	0.261	0.551	6.95632e-10	Sybu
Tacr3	3.81839e-13	-0.976801	0.624	0.844	8.9946e-09	Tacr3
Alcam	7.65704e-12	-1.00486	0.395	0.665	1.80369e-07	Alcam
Pcsk5	7.29822e-12	-1.03573	0.306	0.571	1.71917e-07	Pcsk5
Nav3	6.92355e-19	-1.10687	0.675	0.906	1.63091e-14	Nav3
Synpr	9.93898e-17	-1.11414	0.688	0.884	2.34123e-12	Synpr
Nr6a1	3.88398e-11	-1.11977	0.395	0.631	9.1491e-07	Nr6a1
Nlgn1	1.56962e-13	-1.13282	0.261	0.585	3.6974e-09	Nlgn1
Kcnip4	9.09053e-22	-1.18221	0.758	0.969	2.14137e-17	Kcnip4
Robo2	9.00901e-19	-1.19452	0.318	0.693	2.12216e-14	Robo2
Unc13c	9.45946e-21	-1.19629	0.656	0.938	2.22827e-16	Unc13c
Dkk2	1.41499e-10	-1.3622	0.153	0.386	3.33315e-06	Dkk2
AC129186.1	2.86104e-40	-1.85705	0.446	0.898	6.73948e-36	AC129186.1

## Sheet: iris_pigmented_epithelium
gene	p_val	avg_log2FC	pct.1_dilated	pct.2_control	p_val_adj
Pde10a	4.68598e-160	1.93945	0.322	0.045	1.10383e-155
Fkbp5	8.915e-194	1.34029	0.371	0.054	2.10002e-189
Kcnn2	1.35462e-154	1.27298	0.415	0.126	3.19094e-150
Neat1	0	1.14658	0.98	0.902	0
Mt1	6.30381e-150	0.995374	0.855	0.678	1.48493e-145
Jun	6.20133e-95	0.963746	0.246	0.054	1.46078e-90
Zbtb16	1.77572e-126	0.950373	0.331	0.084	4.18289e-122
Pde1c	4.31075e-191	0.927757	0.972	0.906	1.01544e-186
Mat2a	1.98677e-118	0.867454	0.708	0.482	4.68003e-114
Junb	1.18193e-59	0.852278	0.329	0.162	2.78416e-55
Anks1b	2.15521e-46	0.848345	0.236	0.115	5.07682e-42
Adgrl3	2.44149e-78	0.808524	0.566	0.361	5.75118e-74
Fbln1	6.78483e-67	0.807673	0.428	0.244	1.59824e-62
Mt2	7.24844e-78	0.790914	0.442	0.239	1.70744e-73
Slc6a6	1.30147e-79	0.782716	0.241	0.065	3.06575e-75
Plat	1.63565e-53	0.778704	0.213	0.083	3.85293e-49
Gsdme	1.50032e-65	0.776871	0.617	0.451	3.53416e-61
Ptp4a2	1.22101e-57	0.748015	0.434	0.269	2.87621e-53
Padi2	3.36951e-55	0.738192	0.549	0.404	7.93722e-51
Hif3a	7.01199e-70	0.708432	0.369	0.184	1.65175e-65
Zhx3	6.4122e-71	0.657937	0.581	0.389	1.51046e-66
Btg2	7.31864e-49	0.652832	0.141	0.034	1.72398e-44
Rai14	2.35004e-23	0.646791	0.633	0.583	5.53576e-19
Vcam1	9.65813e-31	0.63735	0.334	0.219	2.27507e-26
Slc38a2	2.56048e-76	0.636629	0.778	0.627	6.03147e-72
Jund	5.42617e-57	0.612544	0.321	0.158	1.27819e-52
Plxna4	7.21653e-67	-0.62549	0.294	0.493	1.69993e-62
Id3	9.40246e-59	-0.664829	0.226	0.401	2.21484e-54
Rbm24	6.32856e-56	-0.674591	0.279	0.443	1.49076e-51
Vat1l	6.04128e-85	-0.686342	0.556	0.74	1.42308e-80
Bmp4	1.30405e-87	-0.719109	0.397	0.609	3.07183e-83
Stac	5.91192e-86	-0.73887	0.685	0.823	1.39261e-81
Mylk	8.37027e-170	-0.892083	0.92	0.968	1.9717e-165
Gm39075	1.95861e-163	-0.988955	0.071	0.325	4.6137e-159
Tyr	1.03443e-298	-1.11646	0.81	0.965	2.43671e-294
Rab38	1.38465e-216	-1.18088	0.456	0.757	3.26169e-212

## Sheet: cilliary_body_epithelium
gene	p_val	avg_log2FC	pct.1_dilated	pct.2_control	p_val_adj
Pde10a	3.51606e-40	1.65939	0.625	0.249	8.28244e-36
Neat1	3.13563e-43	1.23457	0.935	0.737	7.38629e-39
Gpnmb	9.17796e-11	0.899227	0.526	0.359	2.16196e-06
Kcnn2	1.39248e-17	0.878844	0.387	0.158	3.28013e-13
Fkbp5	5.62257e-15	0.802358	0.356	0.158	1.32445e-10
Gm1992	1.98719e-09	0.673106	0.399	0.241	4.68101e-05
Nalcn	2.21483e-09	0.667275	0.169	0.064	5.21726e-05
Isyna1	1.92663e-15	0.620658	0.498	0.255	4.53838e-11
Padi2	1.63505e-06	0.615794	0.21	0.121	0.0385152
Gm39075	3.96649e-12	-0.653214	0.039	0.193	9.34345e-08
Hmx1	6.71737e-12	-0.668524	0.317	0.517	1.58234e-07
Rab38	3.53611e-10	-0.735826	0.391	0.552	8.32966e-06

## Sheet: cillary_body
gene	p_val	avg_log2FC	pct.1_dilated	pct.2_control	p_val_adj
Pde10a	7.75671e-81	2.17494	0.906	0.488	1.82717e-76
Rbms3	4.98732e-21	1.16418	0.639	0.419	1.17481e-16
Neat1	1.3958e-28	1.10795	0.882	0.743	3.28794e-24
Junb	4.06919e-18	1.04403	0.231	0.061	9.58539e-14
Gpnmb	2.81678e-23	1.03563	0.909	0.795	6.63521e-19
Gsdme	2.13605e-21	1.01821	0.783	0.575	5.03168e-17
Dct	8.77147e-33	0.977203	1	0.994	2.06621e-28
Mpp6	4.81209e-14	0.915293	0.57	0.355	1.13353e-09
Slc6a6	6.81203e-20	0.911615	0.479	0.231	1.60464e-15
Oca2	7.75074e-19	0.892564	0.885	0.777	1.82577e-14
Erbb4	4.04764e-09	0.826186	0.597	0.474	9.53461e-05
Akap13	8.17569e-17	0.813795	0.83	0.679	1.92587e-12
Jun	2.57985e-14	0.774812	0.277	0.104	6.07709e-10
Pde3b	2.64573e-19	0.770517	0.189	0.029	6.23227e-15
Rsrp1	1.79533e-24	0.744066	0.931	0.766	4.22907e-20
Hpse2	4.35584e-10	0.735563	0.258	0.104	1.02606e-05
Mlph	1.63985e-15	0.729734	0.602	0.364	3.86282e-11
Cabp1	2.95622e-12	0.716392	0.247	0.087	6.96368e-08
Sh3rf1	1.89983e-09	0.673484	0.746	0.645	4.47524e-05
Tpt1	2.25163e-14	0.666297	0.6	0.367	5.30394e-10
Irak2	9.62446e-10	0.623063	0.575	0.416	2.26714e-05
Mgll	1.50073e-17	0.621142	0.997	0.997	3.53513e-13
Tbc1d1	5.13351e-08	0.615229	0.375	0.234	0.00120925
Pde7b	7.28029e-09	0.614712	0.517	0.353	0.000171494
Igf1r	6.77163e-11	0.614625	0.891	0.818	1.59513e-06
Rbms1	4.07784e-08	0.612708	0.898	0.887	0.000960577
Pitpnm2	3.88966e-11	0.606021	0.66	0.48	9.16249e-07
Id1	2.89725e-08	0.603411	0.375	0.225	0.000682476
9230020A06Rik	1.0251e-08	-0.626529	0.101	0.257	0.000241473
Slc7a2	4.3495e-11	-0.645416	0.528	0.708	1.02457e-06
Gm30275	5.65298e-07	-0.647161	0.123	0.246	0.0133162
Gm43434	9.14962e-09	-0.670233	0.153	0.318	0.000215528
Slc38a8	2.04465e-14	-0.840073	0.291	0.52	4.81638e-10

## Sheet: stroma_1
gene	p_val	avg_log2FC	pct.1_dilated	pct.2_control	p_val_adj
Pde10a	2.10625e-32	1.63697	0.487	0.19	4.96147e-28
Bcl2l1	1.11183e-36	1.29333	0.524	0.201	2.61902e-32
Ntrk3	2.42123e-22	1.07358	0.241	0.034	5.70346e-18
Kif21a	5.57551e-26	0.868088	0.728	0.505	1.31337e-21
Mthfd1l	4.55927e-20	0.86119	0.32	0.105	1.07398e-15
Prickle2	4.01366e-16	0.852887	0.579	0.395	9.45457e-12
1700025G04Rik	1.28746e-16	0.827623	0.313	0.123	3.03274e-12
Slc3a2	2.50662e-18	0.817011	0.53	0.324	5.90459e-14
Ankfn1	8.51879e-13	0.812309	0.581	0.443	2.00669e-08
Taf1d	1.09702e-23	0.807114	0.845	0.717	2.58414e-19
Cpm	6.79554e-15	0.789762	0.278	0.107	1.60076e-10
Cd44	3.43056e-15	0.773378	0.361	0.177	8.08102e-11
Gm47283	1.05629e-17	0.771449	0.604	0.407	2.4882e-13
Lrrc4	8.46415e-16	0.739925	0.48	0.286	1.99382e-11
Fbln5	4.70075e-17	0.718003	0.278	0.093	1.10731e-12
Adam12	9.33132e-13	0.714226	0.243	0.091	2.19808e-08
Ppargc1a	3.26642e-11	0.703239	0.682	0.561	7.69438e-07
Ctsb	3.8526e-14	0.691714	0.419	0.235	9.07517e-10
Snx1	3.58759e-15	0.691675	0.695	0.544	8.45094e-11
Itga4	1.34256e-09	0.691467	0.233	0.117	3.16254e-05
Airn	2.79875e-12	0.679081	0.546	0.385	6.59273e-08
Adamts1	5.41612e-11	0.646825	0.258	0.118	1.27582e-06
Etl4	1.53658e-26	0.646494	0.864	0.687	3.61958e-22
Galnt3	1.58187e-11	0.641604	0.264	0.117	3.72624e-07
Slc45a2	8.10102e-15	0.639959	0.678	0.522	1.90828e-10
Abtb2	4.74364e-12	0.628008	0.427	0.256	1.11741e-07
Fkbp5	1.79625e-12	0.610809	0.157	0.032	4.23124e-08
Mt1	4.84766e-12	0.609204	0.573	0.41	1.14191e-07
Jun	3.30136e-10	0.600713	0.159	0.046	7.77668e-06
Nr3c2	1.17497e-14	-0.605096	0.342	0.522	2.76776e-10
Gucy2f	5.44409e-23	-0.616861	0.608	0.807	1.28241e-18
Myo5a	5.03035e-31	-0.617952	0.915	0.98	1.18495e-26
Rasgrp3	4.27493e-22	-0.629339	0.742	0.89	1.007e-17
Car14	9.91698e-18	-0.630654	0.078	0.219	2.33604e-13
Gsta4	5.49865e-15	-0.666443	0.204	0.36	1.29526e-10
Lrrtm4	6.54866e-10	-0.710636	0.101	0.2	1.5426e-05
Brca1	3.76451e-23	-0.778443	0.249	0.491	8.86768e-19
Erbb4	2.85682e-18	-0.79981	0.338	0.539	6.72952e-14
Gria4	4.29773e-20	-0.808688	0.186	0.384	1.01237e-15
Stxbp5l	2.0378e-20	-0.868195	0.235	0.438	4.80023e-16
Ntm	2.22434e-16	-0.871021	0.394	0.563	5.23964e-12
Gm47771	6.65003e-25	-0.872816	0.14	0.348	1.56648e-20
Prpmp5	4.82882e-25	-1.19157	0.043	0.185	1.13748e-20

## Sheet: stroma_2
gene	p_val	avg_log2FC	pct.1_dilated	pct.2_control	p_val_adj
Fst	2.56438e-135	2.51472	0.366	0.065	6.04066e-131
Slc12a2	1.00869e-290	2.44417	0.704	0.249	2.37608e-286
Rasl11b	3.62568e-199	1.67108	0.667	0.296	8.54066e-195
Tagln	1.99697e-121	1.66052	0.465	0.168	4.70407e-117
Ctgf	2.78802e-100	1.49347	0.421	0.155	6.56746e-96
Cldn5	1.742e-77	1.42737	0.395	0.186	4.10346e-73
Samd4	2.54851e-108	1.41017	0.46	0.184	6.00328e-104
Dgkb	1.9858e-70	1.40339	0.509	0.318	4.67774e-66
Arrdc3	6.35041e-130	1.39067	0.481	0.168	1.4959e-125
Col8a1	4.47333e-85	1.3857	0.338	0.103	1.05374e-80
Nudt4	1.70298e-107	1.29257	0.33	0.073	4.01153e-103
Pde10a	8.68834e-63	1.25957	0.258	0.079	2.04663e-58
Tmem100	1.12669e-84	1.25823	0.372	0.132	2.65402e-80
Errfi1	2.79603e-59	1.24486	0.261	0.086	6.58634e-55
Kcnma1	1.74227e-62	1.21895	0.245	0.069	4.10408e-58
Zbtb16	1.35455e-102	1.21155	0.344	0.086	3.19077e-98
Slc24a3	8.08777e-78	1.2035	0.89	0.818	1.90515e-73
Prkg1	1.69034e-55	1.20057	0.877	0.852	3.98176e-51
Actn2	4.02669e-68	1.14988	0.226	0.047	9.48527e-64
Csrp2	1.03537e-64	1.11711	0.349	0.157	2.43891e-60
Fry	1.92377e-50	1.10958	0.335	0.167	4.53163e-46
Galnt17	1.68489e-74	1.09589	0.265	0.065	3.96894e-70
Prkca	2.63141e-85	1.07297	0.648	0.424	6.19855e-81
Rerg	1.19944e-75	1.07011	0.561	0.336	2.82541e-71
Edn3	2.56253e-76	1.06503	0.466	0.238	6.0363e-72
Thbs1	7.13568e-46	1.06307	0.129	0.013	1.68088e-41
Nkain3	5.25893e-29	1.04361	0.537	0.444	1.23879e-24
Mgp	5.46014e-55	1.04206	0.375	0.176	1.28619e-50
Arid5b	1.6911e-59	1.03758	0.585	0.403	3.98355e-55
Rmst	2.62977e-21	1.03385	0.187	0.102	6.19468e-17
Pten	8.21519e-114	1.01853	0.791	0.554	1.93517e-109
Ctxn3	8.59079e-75	1.00626	0.324	0.107	2.02365e-70
Rcan2	3.43075e-79	1.00151	0.424	0.18	8.08148e-75
Cp	1.92572e-51	0.988493	0.394	0.213	4.53622e-47
Timp3	1.20123e-71	0.988185	0.357	0.135	2.82961e-67
Kcnk13	4.09208e-52	0.956325	0.249	0.088	9.6393e-48
Fbn2	1.60118e-52	0.937035	0.479	0.289	3.77173e-48
C1qtnf7	1.24997e-59	0.929102	0.616	0.43	2.94443e-55
Actn4	1.91803e-60	0.92614	0.48	0.288	4.5181e-56
Tmem2	1.36537e-71	0.905102	0.612	0.395	3.21626e-67
Luzp1	1.10374e-73	0.89913	0.607	0.388	2.59997e-69
Cyr61	2.48434e-51	0.897187	0.143	0.015	5.85211e-47
Slc7a5	3.09895e-53	0.878695	0.177	0.037	7.2999e-49
Adcy2	2.13043e-48	0.876255	0.289	0.122	5.01844e-44
Pdlim5	6.94931e-50	0.873473	0.596	0.435	1.63698e-45
Klhl29	9.03994e-33	0.871919	0.396	0.265	2.12945e-28
Lhfp	2.10568e-74	0.863933	0.793	0.623	4.96014e-70
Sncaip	2.023e-77	0.859541	0.734	0.522	4.76538e-73
Myo1d	2.55653e-58	0.854693	0.463	0.258	6.02216e-54
Mrvi1	6.08102e-53	0.848928	0.31	0.134	1.43244e-48
Tuba1c	2.37541e-54	0.838147	0.24	0.074	5.59551e-50
Mef2c	6.09547e-58	0.837694	0.342	0.146	1.43585e-53
Hip1	5.18171e-59	0.828909	0.494	0.289	1.2206e-54
Gem	1.04757e-48	0.825677	0.243	0.09	2.46766e-44
Fkbp5	8.12844e-51	0.818849	0.269	0.101	1.91473e-46
Thsd4	4.15126e-48	0.817963	0.177	0.042	9.7787e-44
Actn1	2.70274e-56	0.817668	0.391	0.197	6.36657e-52
Nexn	1.42514e-50	0.813566	0.345	0.169	3.35706e-46
Myo1e	1.45486e-45	0.803087	0.379	0.208	3.42707e-41
Flna	2.93552e-50	0.801671	0.365	0.188	6.91492e-46
St5	5.29128e-47	0.800735	0.646	0.484	1.24641e-42
Msrb3	1.56136e-46	0.79227	0.362	0.191	3.67793e-42
Npas2	6.41245e-50	0.790388	0.289	0.114	1.51052e-45
1700011I03Rik	1.46405e-39	0.783526	0.194	0.063	3.44872e-35
Gm17501	1.03255e-54	0.782726	0.172	0.03	2.43228e-50
Gpnmb	1.03922e-45	0.778759	0.451	0.266	2.44798e-41
Dtd1	7.38484e-29	0.776116	0.388	0.266	1.73957e-24
Ank	6.76892e-41	0.76155	0.545	0.38	1.59449e-36
Myh9	1.86839e-39	0.752108	0.569	0.423	4.40117e-35
Cnn2	8.94268e-48	0.751458	0.394	0.213	2.10654e-43
Adra2a	5.70756e-46	0.734926	0.192	0.052	1.34447e-41
Ogfrl1	3.4024e-54	0.734711	0.935	0.912	8.0147e-50
Pld1	9.29221e-56	0.733715	0.533	0.329	2.18887e-51
Col12a1	4.36239e-31	0.731256	0.304	0.177	1.0276e-26
Rasal2	1.49501e-32	0.721838	0.311	0.177	3.52165e-28
Sdc4	1.849e-53	0.71731	0.289	0.109	4.3555e-49
Actg1	1.67864e-47	0.709834	0.39	0.203	3.95419e-43
Pdgfd	9.80357e-24	0.707228	0.472	0.365	2.30933e-19
Srpk2	9.54268e-59	0.704976	0.592	0.384	2.24787e-54
Slc15a2	7.16082e-38	0.699661	0.631	0.484	1.6868e-33
Klf9	3.88928e-43	0.698425	0.345	0.179	9.16159e-39
Nid1	1.654e-30	0.698374	0.549	0.412	3.89616e-26
Arntl	3.46224e-44	0.695951	0.297	0.135	8.15564e-40
Carmn	5.18102e-30	0.695899	0.439	0.311	1.22044e-25
Cpt1a	4.66356e-56	0.695409	0.235	0.067	1.09855e-51
Vcl	1.56153e-42	0.683157	0.368	0.199	3.67833e-38
Serpine2	9.74612e-28	0.679893	0.504	0.357	2.2958e-23
Cacna1c	1.15713e-26	0.673374	0.234	0.124	2.72573e-22
Ext1	5.14327e-24	0.67329	0.506	0.397	1.21155e-19
Sema3g	9.1489e-44	0.673145	0.213	0.07	2.15511e-39
Apbb2	1.07943e-39	0.649452	0.594	0.439	2.54269e-35
Thbd	4.87289e-31	0.649188	0.237	0.113	1.14786e-26
Pde8b	1.38154e-29	0.647386	0.204	0.089	3.25436e-25
Asxl3	4.71565e-35	0.646049	0.282	0.144	1.11082e-30
Col8a2	2.30175e-33	0.643965	0.438	0.282	5.422e-29
Cry1	1.06466e-45	0.643107	0.172	0.041	2.50791e-41
Grk5	7.11417e-25	0.641964	0.268	0.159	1.67581e-20
Limd1	3.16841e-37	0.636844	0.282	0.139	7.46352e-33
Slit3	5.4796e-32	0.62865	0.194	0.08	1.29077e-27
Nedd9	5.65e-44	0.625119	0.144	0.026	1.33091e-39
Ltbp1	2.38265e-13	0.624281	0.212	0.148	5.61257e-09
Acta2	8.70242e-18	0.615283	0.188	0.112	2.04994e-13
Hmgcs2	7.45735e-32	0.612603	0.282	0.147	1.75665e-27
Filip1l	1.34071e-26	0.610494	0.274	0.158	3.15818e-22
Vim	3.16518e-27	0.606893	0.343	0.217	7.45591e-23
Ptpn9	1.55437e-43	0.605513	0.471	0.285	3.66147e-39
Gpr137b	1.02893e-27	0.603848	0.567	0.435	2.42374e-23
Flt1	2.37728e-20	0.603585	0.185	0.095	5.59991e-16
Col4a3	9.76853e-26	0.603283	0.155	0.062	2.30107e-21
Eya2	8.15743e-63	-0.603087	0.888	0.937	1.92156e-58
Tenm4	1.27741e-29	-0.60548	0.165	0.286	3.00907e-25
Fbxl7	1.08591e-44	-0.60933	0.506	0.668	2.55797e-40
Fhit	6.96115e-37	-0.611276	0.348	0.505	1.63977e-32
Slc1a3	5.05731e-32	-0.616373	0.225	0.36	1.1913e-27
Ablim1	3.4864e-88	-0.617921	0.834	0.939	8.21257e-84
Gabrb2	4.21632e-37	-0.625158	0.2	0.35	9.93197e-33
Lrrc7	1.78448e-18	-0.625847	0.387	0.465	4.20351e-14
Unc5c	3.97432e-23	-0.638996	0.418	0.522	9.36191e-19
Arhgap20	6.64304e-30	-0.639458	0.478	0.596	1.56483e-25
Rab30	1.36441e-44	-0.64214	0.195	0.362	3.214e-40
Apc	1.30765e-44	-0.643484	0.423	0.584	3.0803e-40
Rarb	3.84375e-68	-0.64483	0.709	0.853	9.05435e-64
Sash1	2.12806e-53	-0.647014	0.416	0.602	5.01286e-49
Sorcs3	1.88039e-32	-0.64883	0.398	0.539	4.42945e-28
Stxbp6	3.63056e-38	-0.651334	0.22	0.372	8.55214e-34
Hpgd	3.08171e-38	-0.65424	0.083	0.204	7.25927e-34
Lhfpl2	7.98187e-51	-0.658388	0.533	0.69	1.88021e-46
Unc13c	5.63734e-35	-0.665446	0.107	0.228	1.32793e-30
Pitx2	1.06363e-57	-0.6785	0.661	0.797	2.50549e-53
Tle4	4.5267e-55	-0.678555	0.593	0.742	1.06631e-50
Cacna2d1	5.08776e-94	-0.69145	0.941	0.986	1.19847e-89
Nlgn1	7.51194e-22	-0.70223	0.148	0.24	1.76951e-17
Eea1	2.74321e-42	-0.709814	0.332	0.478	6.46191e-38
Lmx1b	2.31756e-64	-0.720423	0.55	0.727	5.45923e-60
Kcnq3	9.40224e-26	-0.73708	0.244	0.375	2.21479e-21
Gm43824	1.6315e-88	-0.747023	0.766	0.911	3.84316e-84
Dcn	4.14832e-65	-0.768744	0.708	0.83	9.77178e-61
Ddx60	1.43212e-46	-0.774963	0.195	0.356	3.37351e-42
Nrxn1	8.33991e-40	-0.776357	0.466	0.599	1.96455e-35
Robo2	1.04683e-106	-0.794502	0.861	0.955	2.46592e-102
Cntn1	1.3043e-47	-0.803544	0.314	0.488	3.07241e-43
Hgf	5.49409e-59	-0.811304	0.459	0.637	1.29419e-54
Adra1b	1.12173e-51	-0.823922	0.164	0.325	2.64234e-47
Gpr165	2.10945e-61	-0.84139	0.038	0.171	4.96903e-57
Cntnap5b	8.70427e-16	-0.854595	0.176	0.246	2.05038e-11
Zfp618	7.10854e-105	-0.912191	0.651	0.823	1.67449e-100
Grb14	1.77485e-70	-0.924781	0.275	0.485	4.18084e-66
Pid1	1.68431e-81	-0.939015	0.691	0.835	3.96755e-77
Zeb2	1.34312e-162	-0.995709	0.8	0.953	3.16385e-158
Lypd1	2.00886e-63	-1.04721	0.081	0.232	4.73207e-59
Adamts16	3.24472e-157	-1.54217	0.32	0.631	7.64327e-153

## Sheet: leukocytes
gene	p_val	avg_log2FC	pct.1_dilated	pct.2_control	p_val_adj
Fkbp5	4.65989e-11	2.00055	0.51	0.119	1.09768e-06
Pde7b	5.15155e-09	1.76752	0.588	0.269	0.00012135
Man2a1	7.74512e-08	1.6782	0.559	0.285	0.00182444
App	3.60272e-09	1.57376	0.863	0.72	8.48657e-05
Arhgap24	1.46493e-06	1.50882	0.373	0.119	0.0345079
Pde3b	1.34471e-14	1.42762	0.853	0.497	3.16759e-10
Abca1	4.64419e-08	1.24285	0.696	0.43	0.00109398
Cyth1	2.24813e-07	1.18262	0.49	0.187	0.00529569
Cebpb	2.79331e-07	1.11347	0.304	0.041	0.00657993
Inpp5d	2.18777e-08	1.10419	0.892	0.782	0.000515351
Ccnd3	4.99632e-09	1.03996	0.775	0.482	0.000117693
Picalm	4.67773e-07	0.936548	0.794	0.565	0.0110189
Ulk2	5.23385e-07	-0.800734	0.49	0.762	0.0123289
Apobec1	1.74437e-07	-0.831466	0.5	0.788	0.00410905
Ly86	1.50668e-06	-0.866874	0.441	0.705	0.0354913
Hdac9	5.02393e-07	-0.896592	0.578	0.808	0.0118344
Zeb2	7.65468e-10	-0.897766	0.941	0.995	1.80314e-05
Acat1	1.10171e-06	-0.91124	0.098	0.301	0.025952
Hpgds	1.18747e-07	-0.94351	0.471	0.725	0.00279721
Gatm	1.31787e-06	-0.954203	0.441	0.658	0.0310437
Abcd2	9.52152e-07	-0.975398	0.02	0.176	0.0224289
Tnfrsf11a	2.89324e-07	-0.98711	0.471	0.736	0.00681532
Clec12a	4.3776e-08	-1.00107	0.02	0.202	0.00103119
Rasa4	1.86934e-06	-1.00459	0.186	0.409	0.0440341
Ighm	2.0774e-07	-1.01967	0.098	0.347	0.00489353
Mbnl1	3.26216e-10	-1.03607	0.676	0.922	7.68434e-06
Ehd4	1.76434e-09	-1.03998	0.48	0.772	4.15609e-05
Ptpra	2.11857e-09	-1.05819	0.255	0.596	4.9905e-05
Clec10a	3.76678e-07	-1.05869	0.167	0.435	0.00887303
Rgl1	1.89839e-07	-1.05871	0.186	0.44	0.00447186
Abhd12	4.03074e-08	-1.06798	0.343	0.632	0.000949481
Dock8	1.04065e-10	-1.06938	0.647	0.865	2.45136e-06
Armc2	2.23899e-09	-1.08237	0.01	0.207	5.27415e-05
St8sia4	2.27568e-07	-1.09686	0.324	0.58	0.0053606
Spats2l	7.71647e-08	-1.10447	0.078	0.29	0.00181769
Apbb1ip	3.83392e-07	-1.11817	0.255	0.518	0.00903118
Tslp	1.0091e-06	-1.12268	0.02	0.166	0.0237703
Sesn1	2.27745e-11	-1.14645	0.412	0.762	5.36477e-07
Gm20663	1.1108e-06	-1.17597	0.176	0.425	0.0261661
Lpar6	1.09752e-08	-1.18633	0.225	0.492	0.000258532
Ripor2	5.97116e-08	-1.19846	0.078	0.295	0.00140657
Mrc1	1.70685e-09	-1.24013	0.657	0.85	4.02066e-05
Cybb	3.26985e-09	-1.2558	0.225	0.544	7.70245e-05
Arhgap17	1.01092e-09	-1.28313	0.245	0.549	2.38133e-05
St3gal6	7.17074e-09	-1.32435	0.412	0.689	0.000168914
Atp6v0a1	2.1917e-12	-1.32482	0.431	0.782	5.16278e-08
Arsb	1.03463e-12	-1.32644	0.5	0.834	2.43717e-08
3110035E14Rik	1.28337e-10	-1.3608	0.059	0.311	3.02311e-06
Rasgrp3	4.53325e-14	-1.41657	0.049	0.404	1.06785e-09
Rbpj	1.09653e-10	-1.44094	0.569	0.824	2.58299e-06
Selenop	1.69099e-10	-1.4507	0.255	0.549	3.9833e-06
Wwp1	2.30887e-14	-1.59103	0.461	0.793	5.43877e-10
Clec2d	3.61955e-14	-1.6008	0.333	0.689	8.52621e-10
Hpgd	2.46348e-18	-1.91193	0.157	0.591	5.80297e-14
Cmah	4.39565e-23	-2.02749	0.069	0.549	1.03544e-18

## Sheet: notes
Differentially expressed gene are defined as genes with log2 fold change greater than 0.6 or smaller than -0.6, and p_val_adj < 0.05
avg_logFC: log fold-chage of the average expression between the two groups. Positive values indicate that the gene is more highly expressed in the first group
pct.1: The percentage of cells where the gene is detected in the first group
pct.2: The percentage of cells where the gene is detected in the second group
p_val_adj: Adjusted p-value, based on bonferroni correction using all genes in the dataset
